# Supplementary figures and images for: Synergistic Chemopreventive Effects of a Novel Combined Plant Extract Comprising Gallic Acid and Hesperidin on Colorectal Cancer
Source: MDPI journal article supplement (doi:10.3390/cimb45060312), 2023-06-05

A.

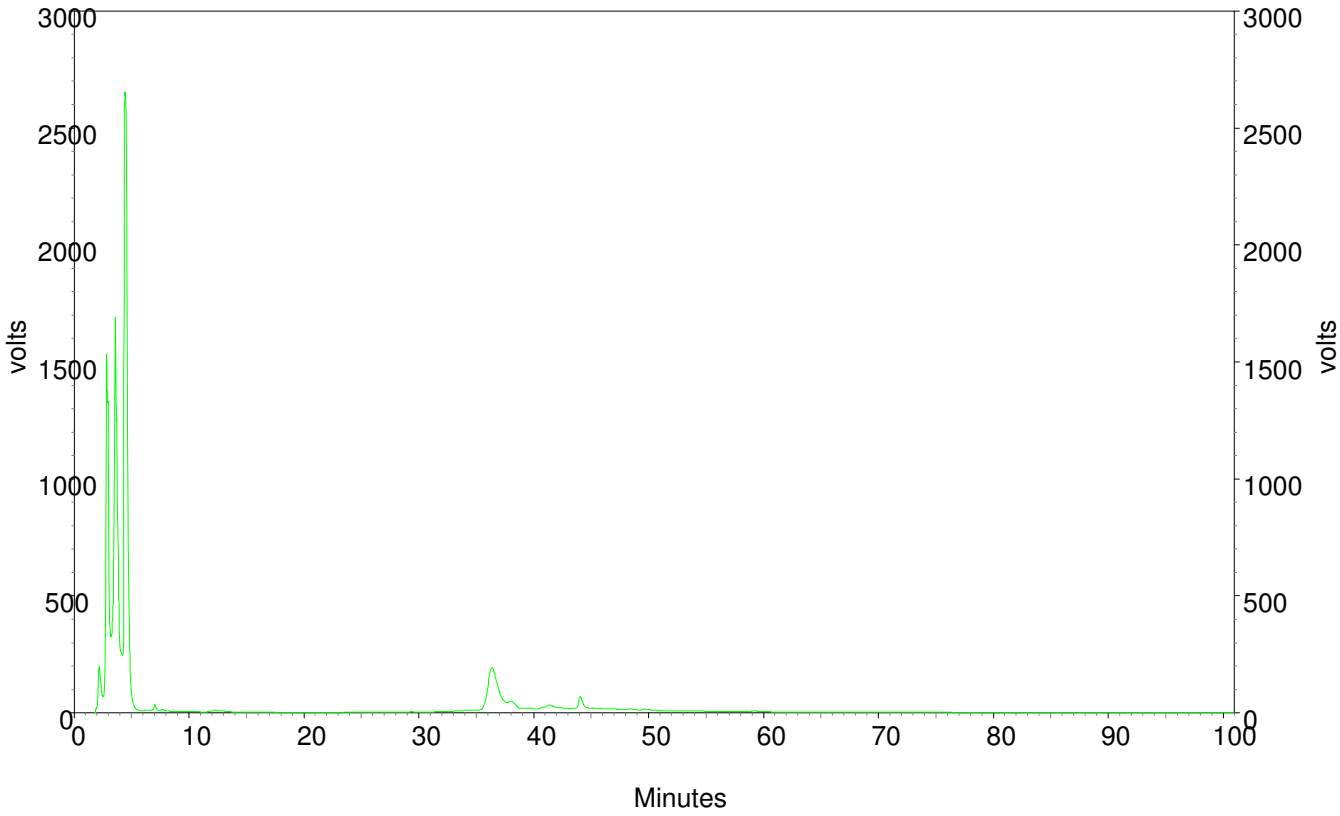

B.

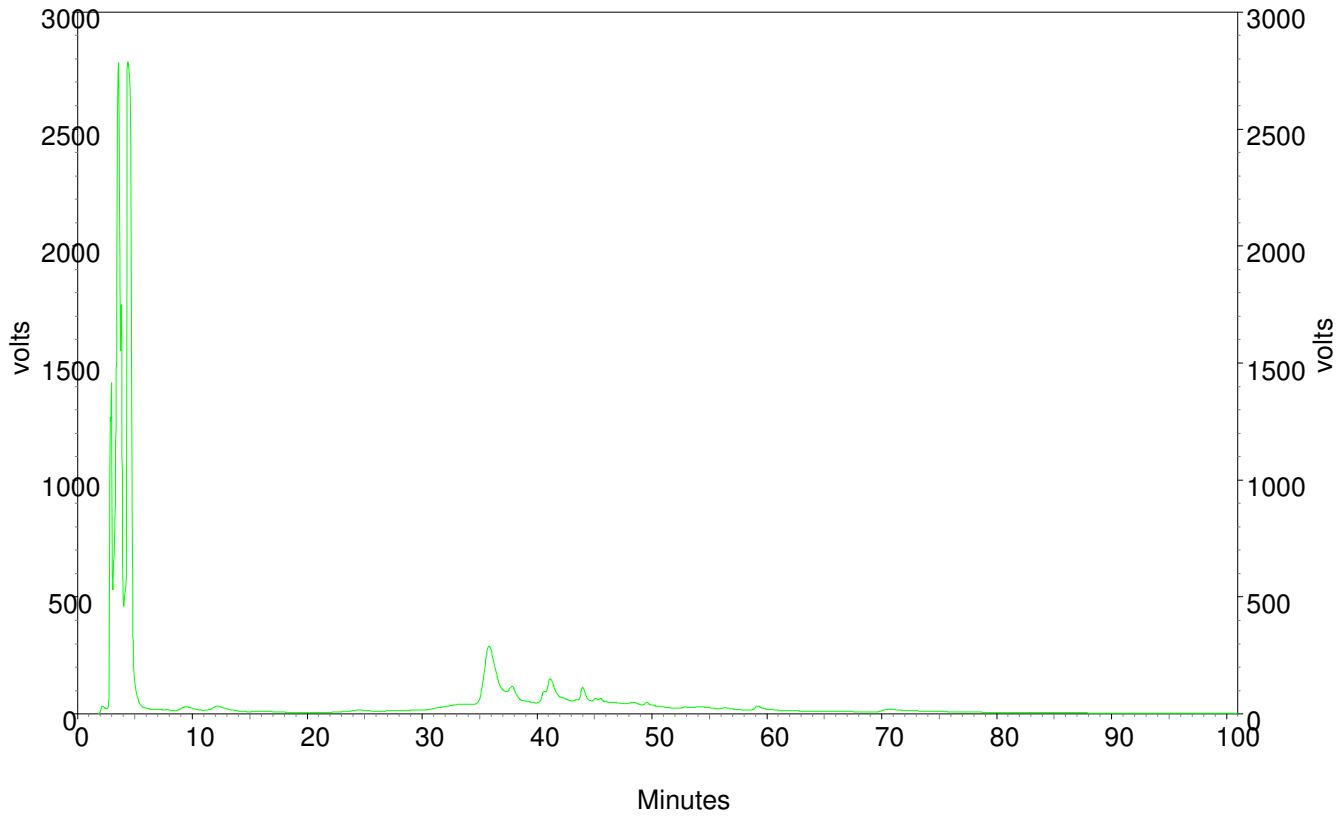

Supplement: s1 [file s1]
